# Supplementary material
Source: PubMed Central journal article supplement (PMC4123404)
Supplement: CJN.11901113_CJN11901113SupplementaryData.pdf [file CJN.11901113_CJN11901113SupplementaryData.pdf]

**Supplementary Table 1.** Specific causes of cardiovascular death

| Mortality cause                                                                                                                                     | No of CVD-deaths |
|-----------------------------------------------------------------------------------------------------------------------------------------------------|------------------|
| Ischemic heart disease                                                                                                                              | 46               |
| Cerebrovascular disease                                                                                                                             | 14               |
| Heart Failure                                                                                                                                       | 10               |
| Other cardiovascular disease<br>(including, generalized<br>atherosclerosis, malignant<br>hypertension, arrhythmias,<br>valvular disease, aneurysms) | 19               |
| Total                                                                                                                                               | 89               |

**Supplementary Table 2.** The association between KIM-1 concentrations (without creatinine standardization) and cardiovascular mortality: multivariable Cox regression

|                          | <b>Model A</b><br><b>Hazard ratio</b><br>(95% CI) | <b>Model B</b><br><b>Hazard ratio</b><br>(95% CI) | <b>Model C</b><br><b>Hazard ratio</b><br>(95% CI) |
|--------------------------|---------------------------------------------------|---------------------------------------------------|---------------------------------------------------|
| <i>Continuous models</i> |                                                   |                                                   |                                                   |
| 1 SD increase            | 1.29 (1.09-1.51)<br>†                             | 1.30 (1.10-1.55) †                                | 1.22 (1.01-1.47)*                                 |

\*p<0.05, † p<0.01, ‡ p<0.001

Model A age

Model B age and established cardiovascular risk factors (known CVD at baseline, antihypertensive treatment, lipid lowering treatment, low-dose aspirin treatment, current smoking, diabetes, systolic blood pressure, BMI, total cholesterol and HDL cholesterol)

Model C age, established cardiovascular risk factors, eGFR, and albumin/creatinine ratio

**Supplementary Table 3.** The association between KIM-1/ 24 hours, KIM-1/creatinine and cardiovascular mortality.

|                                           | <b>Number of<br/>events/<br/>numbers at<br/>risk</b> | <b>KIM-1/<br/>24 hours</b> | <b>KIM-<br/>1/creatinine</b> |
|-------------------------------------------|------------------------------------------------------|----------------------------|------------------------------|
|                                           |                                                      | HR (95 % CI)               | HR (95 % CI)                 |
| Whole sample                              | 89/590                                               | 1.08 (0.94-1.24)           | 1.50 (1.29-1.75)             |
| Individuals with >1 l urine/24<br>hours   | 64/402                                               | 1.86 (1.08-3.23)           | 1.51 (1.28-1.78)             |
| Individuals with >1.5 l urine/24<br>hours | 34/195                                               | 2.97 (1.41-6.27)           | 1.56 (1.29-1.89)             |
